# Supplementary material for: Oncogenic features of the bone morphogenic protein 7 (BMP7) in pheochromocytoma
Source: PubMed Central journal article supplement (PMC4770760; doi:10.18632/oncotarget.4912), 2015-08-18
Supplement: oncotarget-06-39111-s001.pdf [file oncotarget-06-39111-s001.pdf]

## SUPPLEMENTARY TABLE AND FIGURES

**Supplementary Table S1: Primer sequences used to amplify the genes encoding the BMP7 receptors in rat and mouse PCC cells and in rat tissues**

| Rat              |                               | Mouse            |                               |
|------------------|-------------------------------|------------------|-------------------------------|
| <i>rAcvr2b-F</i> | 5'-CATCACGTGGAACGAACTGTGC-3   | <i>mAcvr2a-F</i> | 5'-AAACGGCGACATTGTTTTGC-3     |
| <i>rAcvr2b-R</i> | 5'-AGCATGTACTCATCGACAGGCC-3   | <i>mAcvr2a-R</i> | 5'-GTGTGACTTCCATCTCCGGA-3     |
| <i>rAcvr2a-F</i> | 5'-TCAGACTGGTGTGAGCCTT-3      | <i>mAcvr2b-F</i> | 5'-CATCACGTGGAACGAACTGTGC-3   |
| <i>rAcvr2a-R</i> | 5'-GTGTGACTTCCATCTCCGGA-3     | <i>mAcvr2b-R</i> | 5'-AGCATGTACTCATCGACAGGCC-3   |
| <i>rAlk2-F</i>   | 5'-TGCTAATGATGATGGCTCTCC-3    | <i>mAlk2-F</i>   | 5'-TCGATGGAGTAATGATCCTTCC-3   |
| <i>rAlk2-R</i>   | 5'-CGATCCAGGGAAGGATTC-3       | <i>mAlk2-R</i>   | 5'-CCGTGATGTTCTGTACACC-3      |
| <i>rAlk3-F</i>   | 5'-GGAGGAATCGTGGAGGAATAT-3    | <i>mAlk3-F</i>   | 5'-CAGACTTGGACCAGAAGAAGCC-3   |
| <i>rAlk3-R</i>   | ATACGCAAAGAACAGCATGTC-3       | <i>mAlk3-R</i>   | 5'-ACATTCTATTGTCTGCGTAGC-3    |
| <i>rAlk6-F</i>   | 5'-AGACTGAGATATATCAGACGGTCC-3 | <i>mAlk6-F</i>   | 5'-AGACTGAGATATATCAGACGGTCC-3 |
| <i>rAlk6-R</i>   | 5'-CGTGTGTAGATGGCACAGG-3      | <i>mAlk6-R</i>   | 5'-CGTGTGTAGATGGCACAGG-3      |
| <i>rBmpr2-F</i>  | 5'-GGAGAAATCAAAGGGGAC-3       | <i>mBmpr2-F</i>  | 5'-GGAGAAATCAAAGGGGAC-3       |
| <i>rBmpr2-R</i>  | 5'-CTCCTGTCAACATTCTGTATCC-3   | <i>mBmpr2-R</i>  | 5'-CTCCTGTCAACATTCTGTATCC-3   |

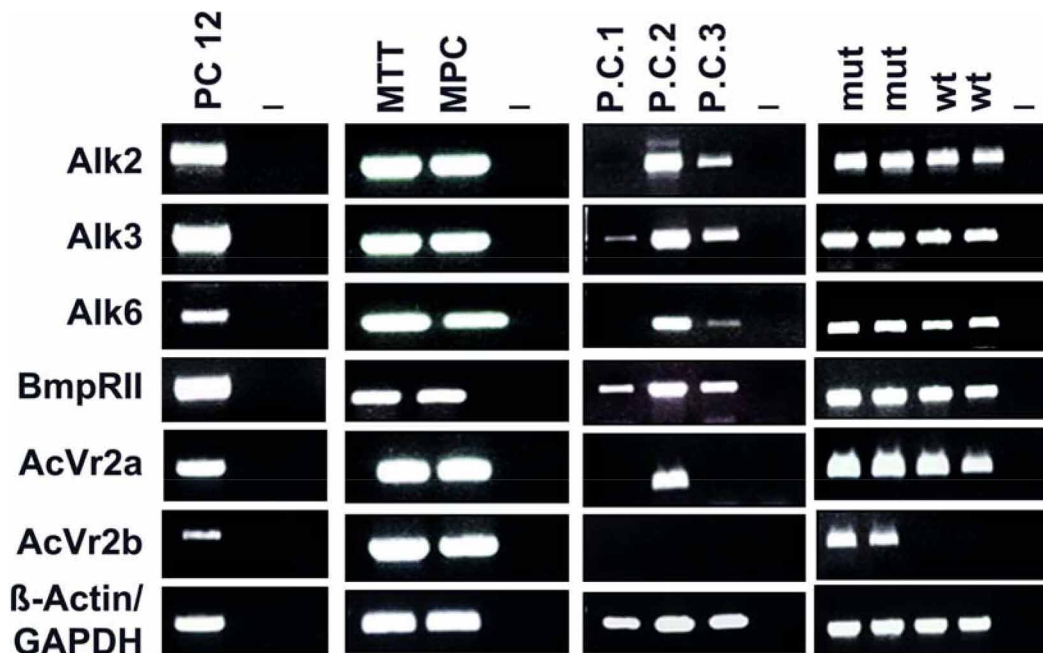

**Supplementary Figure S1: Bmp7 receptor expression in PCC cells and tissues.** RNA was extracted from three rat PCC primary cell cultures (P.C. #1–3), from PC12, MPC and MTT cells and from adrenal medullary tumors of two mutants (mut) and from adrenal medulla of two wild-type (wt) rats. RNA was reverse transcribed into cDNA, and amplified by RT-PCR using primers specific for Alk 2, 3, and 6, BmprII, AcVr2a,b,  $\beta$ -Actin (for rat), and GAPDH (for mouse). The PCR products were detected on a 1% agarose gel following ethidium bromide staining.

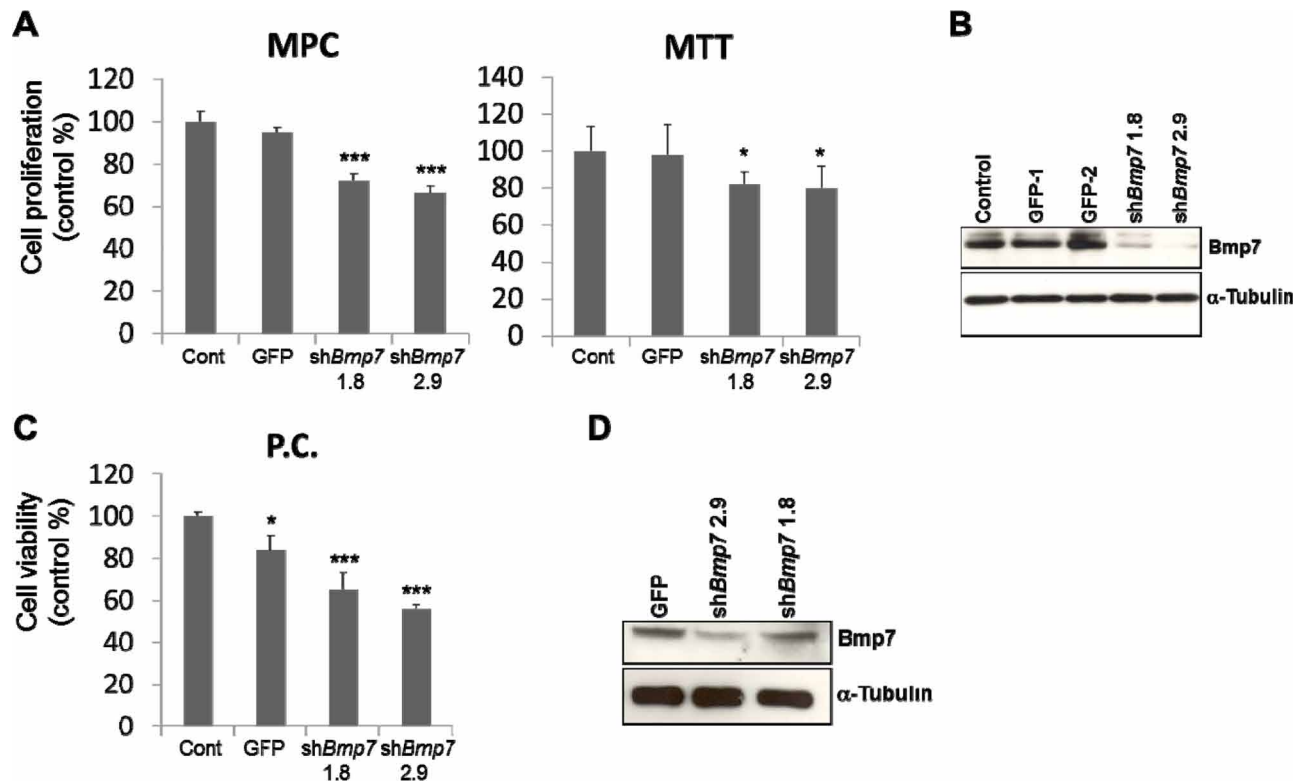

**Supplementary Figure S2: shRNA-mediated knockdown of *Bmp7* in PCC cell lines and primary cells.** **A.** MPC and MTT cells were infected with lentiviral vectors containing sh*Bmp7*-GFP (#1.8, #2.9), GFP alone (GFP) or left uninfected (Cont), and 72 h later we assessed proliferation using the WST-1 assay. Data were analyzed independently with six technical replicates each, and are expressed as the mean  $\pm$  SD. Proliferation was normalized against the values of uninfected cells arbitrarily set to 100%. \*,  $P < 0.05$ ; \*\*\*,  $P < 0.001$ . **B.** In parallel to A, total proteins were extracted from MPC cells and western blotting was performed using the anti-BMP7 antibody.  $\alpha$ -Tubulin was used as loading control. **C.** Primary rat PCC cells (P.C.) were infected with lentiviral vectors containing sh*Bmp7*-GFP (#1.8, #2.9), GFP alone (GFP) or left uninfected (Cont) and cell viability was measured 72 h after infection. The average of two independent cultures from two mutant rats is shown. Proliferation was normalized against the values of uninfected cells which was arbitrarily set to 100%. \*,  $P < 0.05$ ; \*\*\*,  $P < 0.001$ . **D.** From infected primary PCC cells treated as in C, proteins were extracted and western blotting was performed using the anti-BMP7 antibody.  $\alpha$ -Tubulin was used as loading control.
